# Supplementary material for: Cellulose nanofiber backboned Prussian blue nanoparticles as powerful adsorbents for the selective elimination of radioactive cesium
Source: PubMed Central journal article supplement (PMC5109467; doi:10.1038/srep37009), 2016-11-15
Supplement: srep37009-s1.pdf [file srep37009-s1.pdf]

## Supporting information

### **Cellulose nanofiber backboned Prussian blue nanoparticles as powerful adsorbents for the selective elimination of radioactive cesium**

Adavan Kiliyankil Vipin<sup>1\*</sup>, Bunshi Fugetsu<sup>2</sup>, Ichiro Sakata<sup>1,2</sup>, Akira Isogai<sup>3</sup>, Morinobu Endo<sup>4</sup>, Mingda Li<sup>5</sup>, Mildred S. Dresselhaus<sup>6</sup>

<sup>1</sup> School of Engineering, The University of Tokyo, Bunkyo-ku, Tokyo 113-0032, Japan

<sup>2</sup> Policy Alternative Research Institute, The University of Tokyo, Bunkyo-ku, Tokyo 113-0032, Japan

<sup>3</sup> School of Agriculture and Life Sciences, The University of Tokyo, Tokyo 113-8657, Japan

<sup>4</sup> Institute of Carbon Science and Technology, Shinshu University, 4-17-1 Wakasato, Nagano 380-8553, Japan

<sup>5</sup> Department of Mechanical Engineering, Massachusetts Institute of Technology, 77 Massachusetts Avenue, Cambridge, MA 02139, USA.

<sup>6</sup> Department of Physics and Department of Electrical Engineering and Computer Science, Massachusetts Institute of Technology, 77 Massachusetts Avenue, Cambridge, MA 02139, USA.

\*Correspondence and request for materials should be addressed to A.K.V. (E-mail: [vipin@ipr-ctr.t.u.-tokyo.ac.jp](mailto:vipin@ipr-ctr.t.u.-tokyo.ac.jp) )

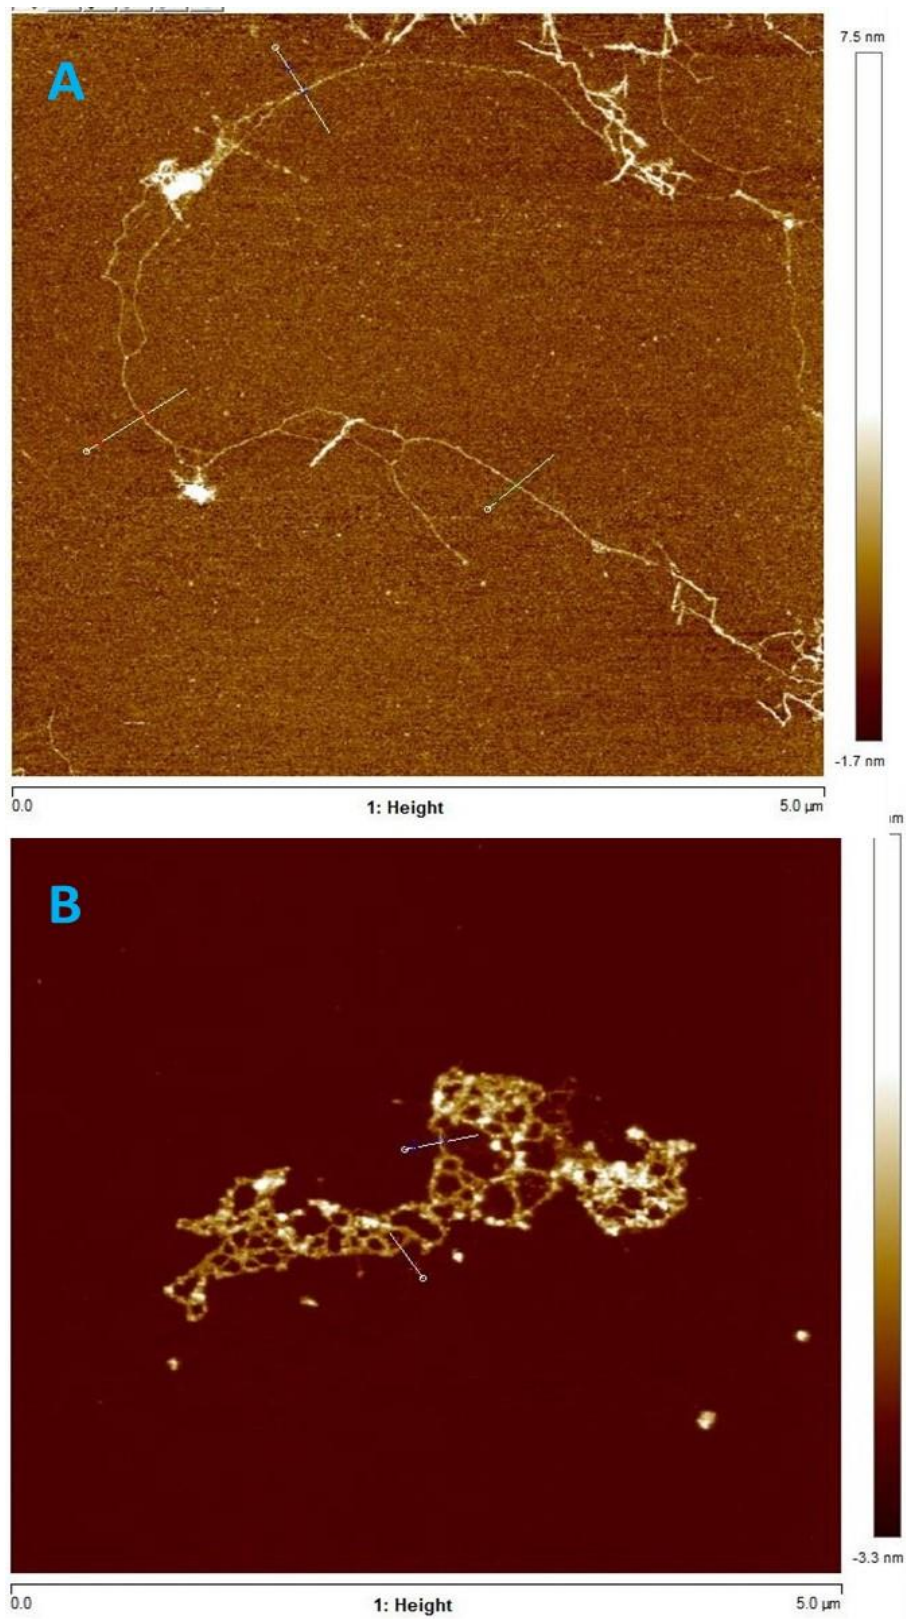

**Figure S1.** AFM images: A) CNF and B) CNF/Ferric(III).

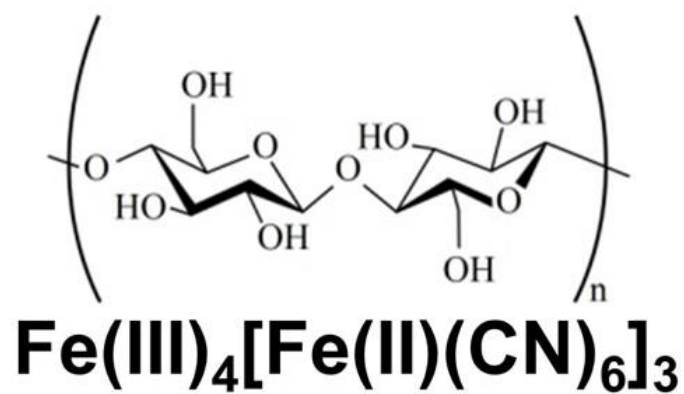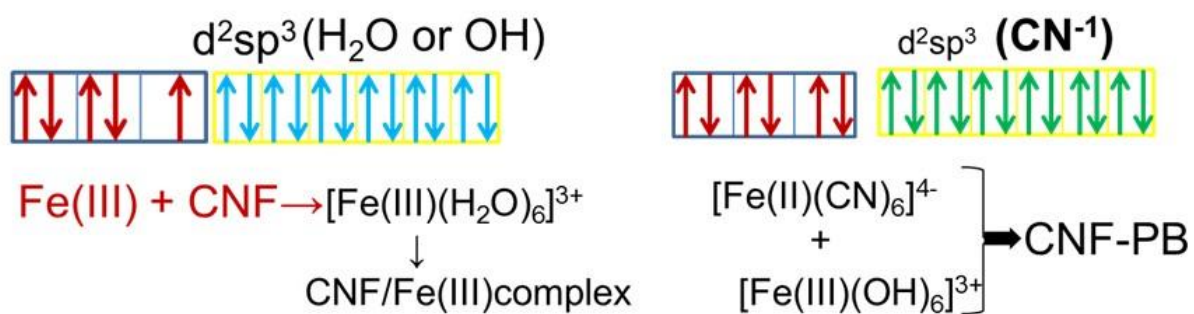

**Figure S2.** Formation of the chelated CNF/PB complex.

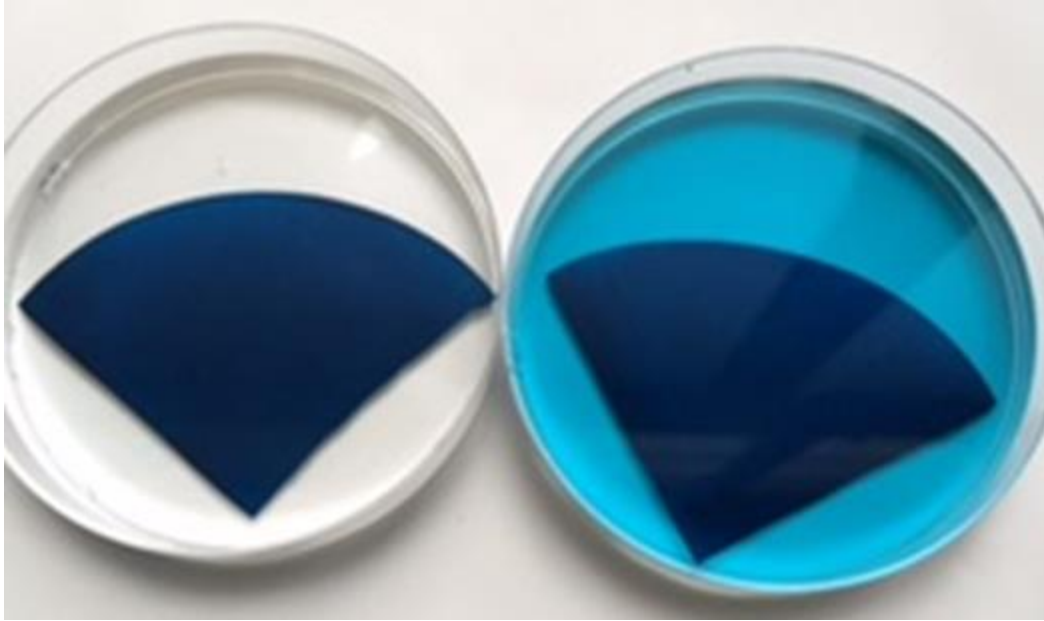

**Figure S3.** Photos of a CNF/PB sample (left) and a normal sized cellulose/PB sample (right) being immersed in tap water for two days.

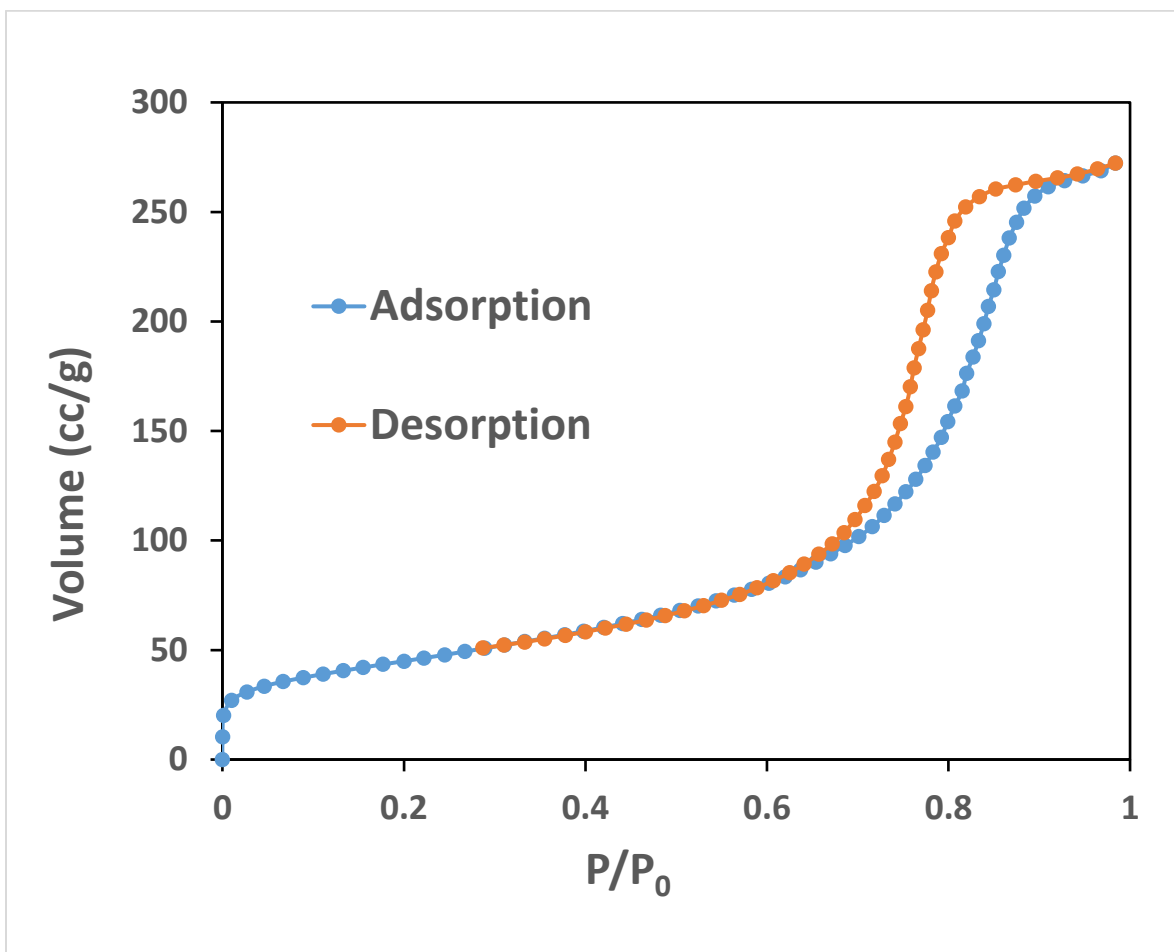

**Figure S4.** Nitrogen adsorption and desorption isotherms of a typical CNF/PB complex powder sample.

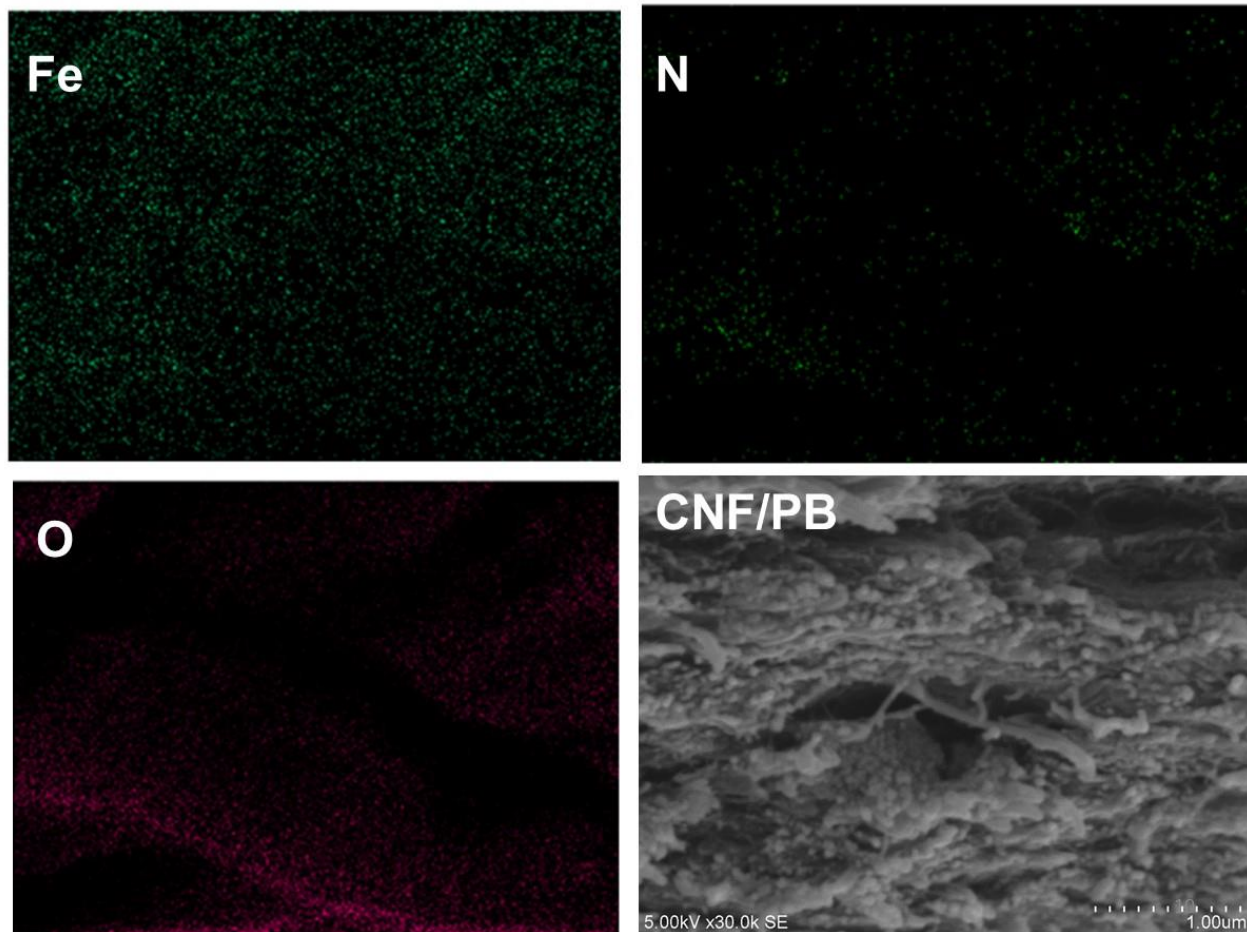

**Figure S5:** EDS mappings of a CNF/PB complex powder sample.

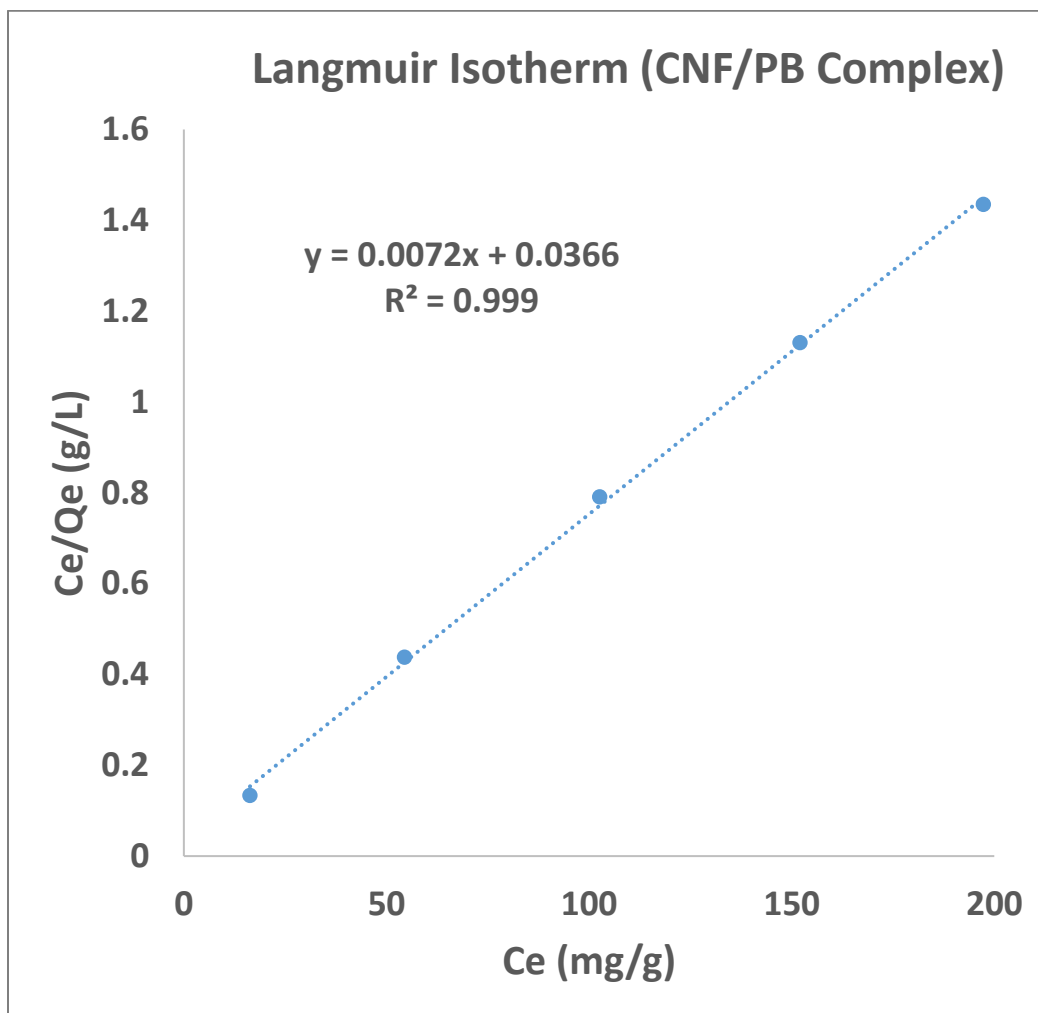

**Figure S6.** Linear fitting of CNF/PB complex powder Cs adsorption data on Langmuir isotherm.

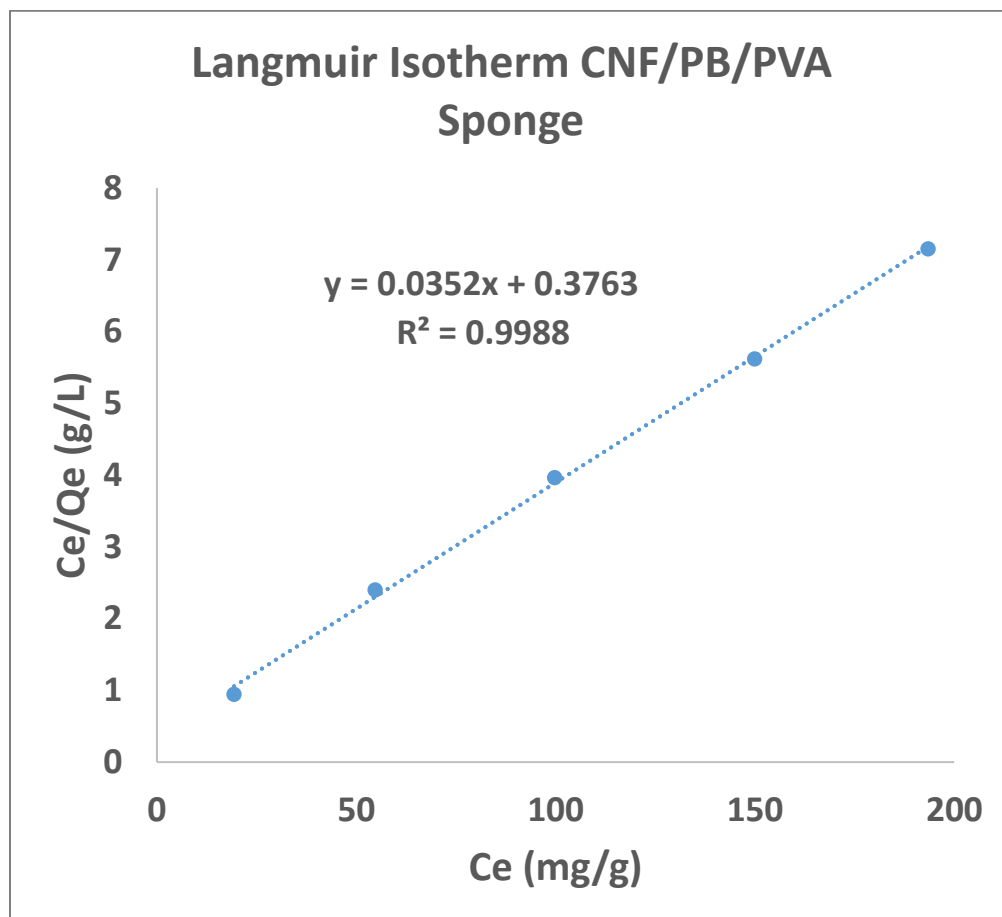

**Figure S7.** Linear fitting of CNF/PB sponge Cs adsorption data on Langmuir isotherm.



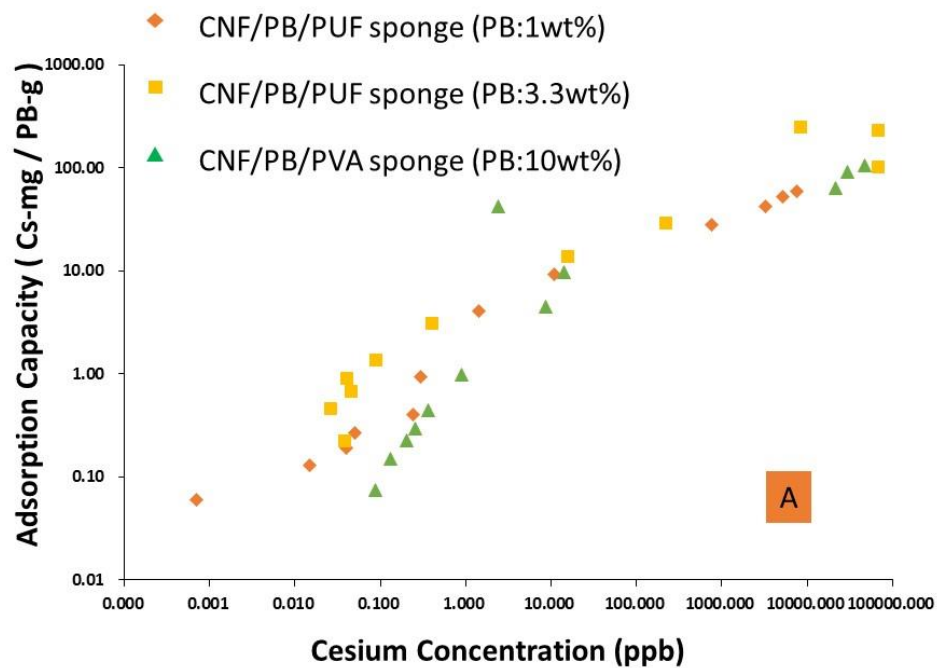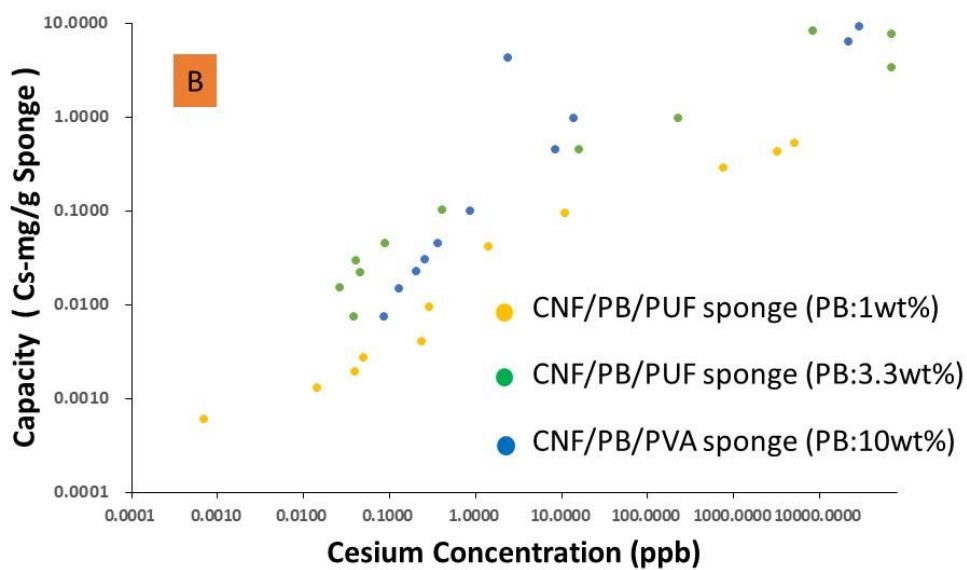

**Figure S8.** Low level Cesium adsorption experiments using CNF/PB sponges: A) Adsorption capacity based on PB and B) adsorption capacity of Cs based on the different sponges.

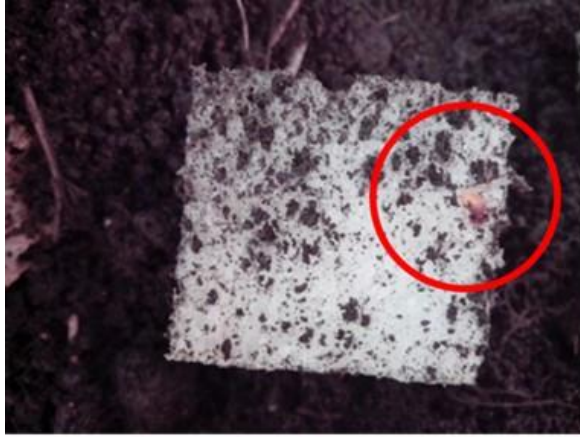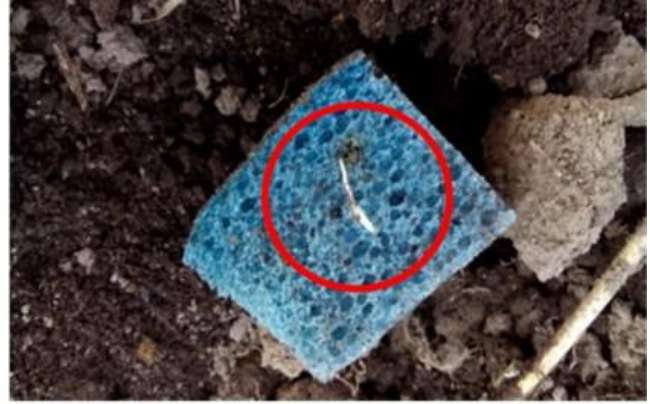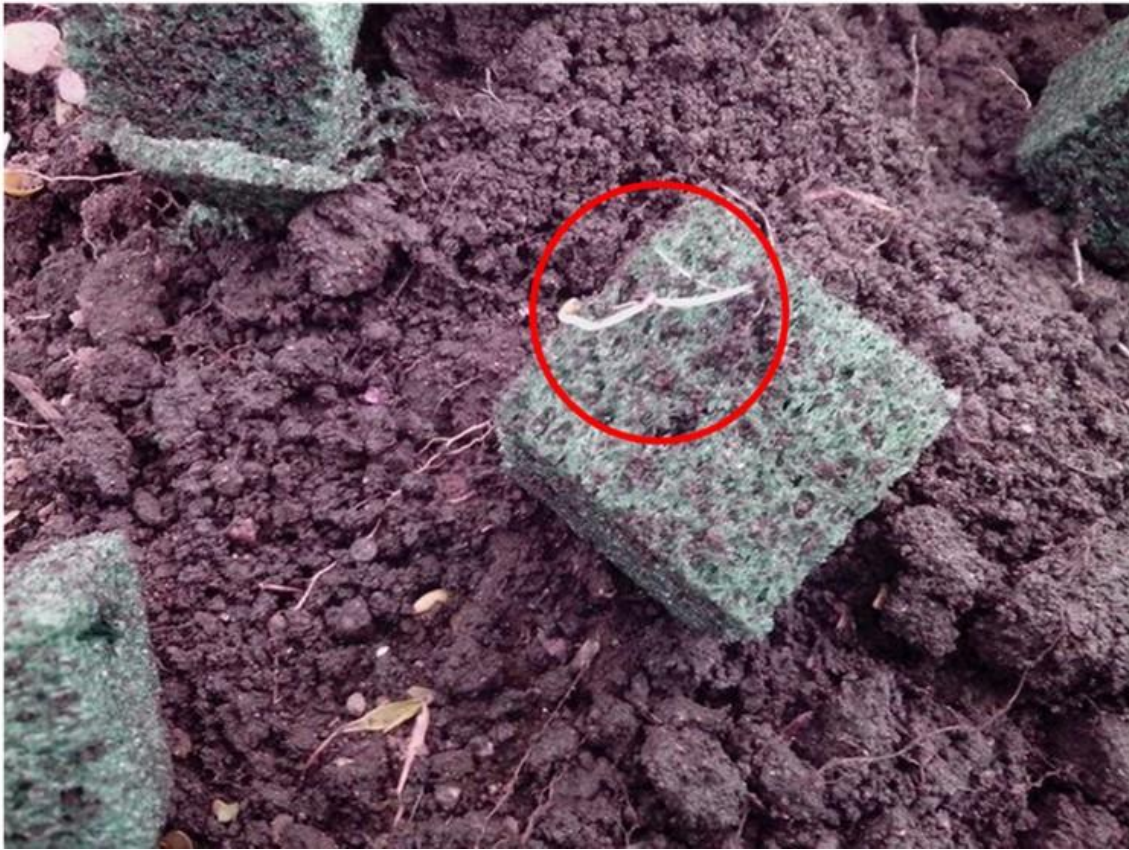

**Figure S9.** Seedling stage of plants in the sponge after one week.

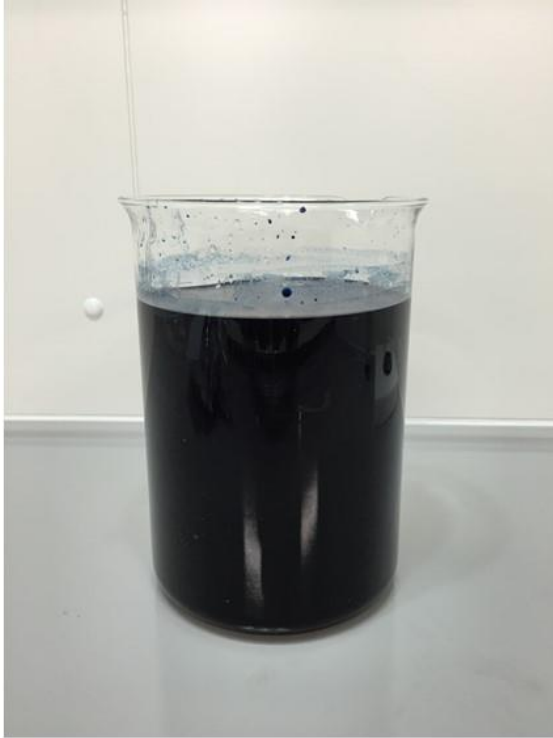

**CNF/PB in water (Zero hour)**

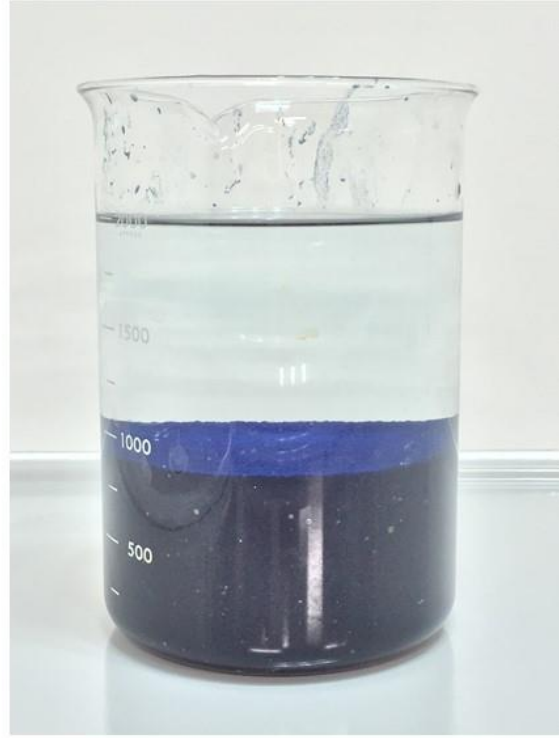

**CNF/PB in water (One hour)**

**Figure S10.** CNF/PB complex colloids settling property.

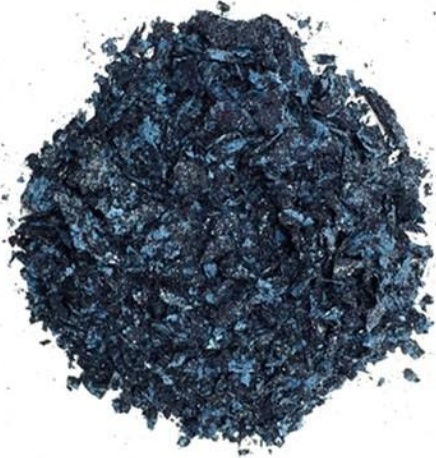

**CNF/PB Crude**

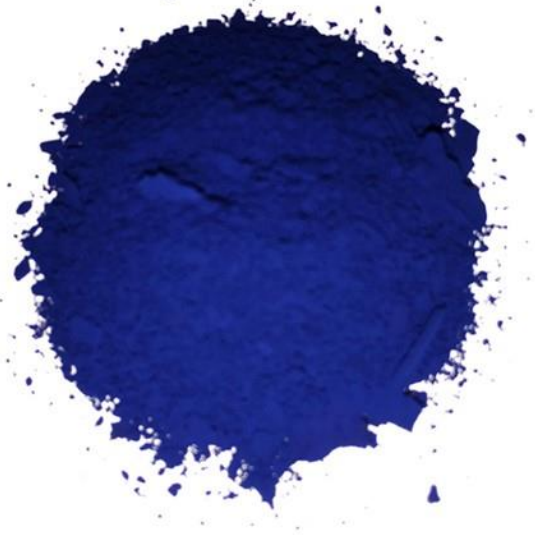

**CNF/PB Pure**

**Figure S11.** CNF/PB complex powder photo images.

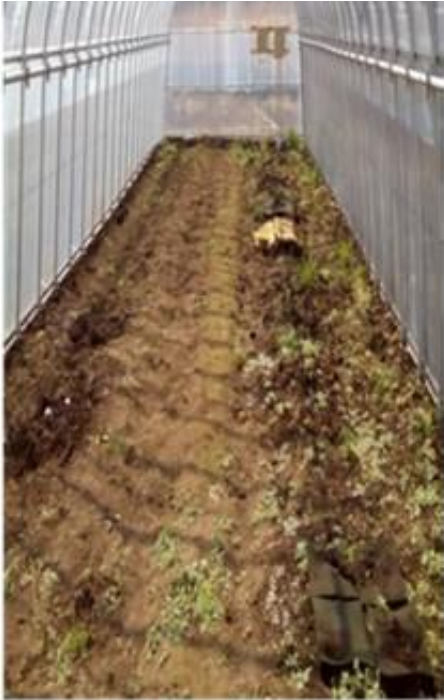

**Vinyl green house (20m x 4m)**

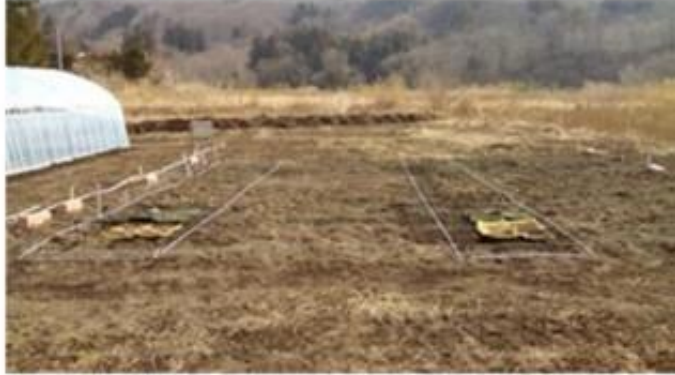

**Open farmland (10m x 8m)**

**Figure S12.** Selected area for practical feasibility studies (At Fukushima, Japan).

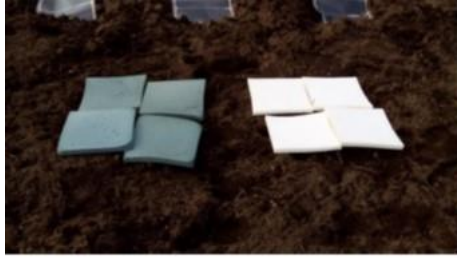

**Sponges paved on  
the contaminated  
soil**

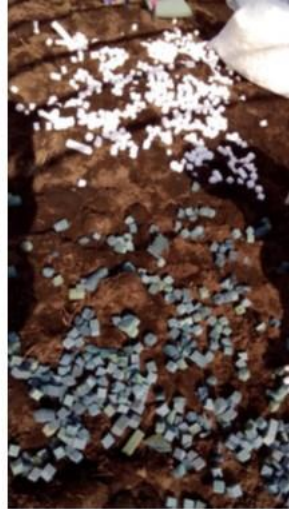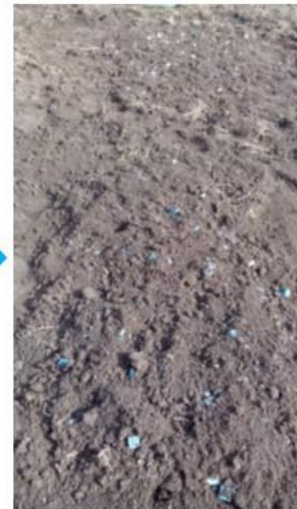

**Sponges covered  
with  
contaminated soil**

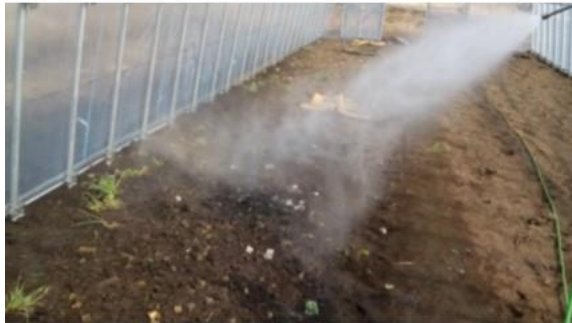

**Water sprinkling to  
grow seed**

**Figure S13.** Practical set up of decontamination using the CNF/PB sponge with seeds.
